# Supplementary material for: Monomeric eNAMPT in the development of experimental diabetes in mice: a potential target for type 2 diabetes treatment
Source: PubMed Central journal article supplement (PMC5506101; doi:10.1007/s00125-016-4076-3), 2016-08-19
Supplement: 125_2016_4076_MOESM1_ESM.pdf [file 125_2016_4076_MOESM1_ESM.pdf]

## **ESM Materials and Methods**

### **Serum NMN measurements**

NMN was detected fluorometrically in serum using high-performance liquid chromatography (HPLC), using a modified version of a previously described methodology (37). Plasma samples (30  $\mu$ l) were extracted with 100  $\mu$ l perchloric acid (1 mol/L) and then neutralized by addition of 330  $\mu$ l  $K_2CO_3$  (3 mol/L) followed by incubation at 4°C for 10 min. Serum samples and standard solutions of NMN (30  $\mu$ l; 25 – 200  $\mu$ M) were subsequently derivatised by addition of 100  $\mu$ l KOH (1 mol/L) and 50  $\mu$ l acetophenone (Sigma, Poole, UK) followed by incubation at 4°C for 15 min. Formic acid (100  $\mu$ l) was then added and the solution incubated for 5 min at 100°C, producing a highly fluorescent compound. Samples or standards were injected into the HPLC system consisting in a mobile phase of 0.1 M ammonium acetate and 1 mM EDTA buffer pH 5.65, 15% acetonitrile, a C18 column (15 cm length; 2 mm internal diameter) and a fluorometric detector (FP-920 Intelligent Fluorescence Detector; JASCO, Essex, UK) with excitation and emission wavelength of 332 and 454 nm, respectively.

### **Islet isolation**

Islet isolation was conducted as previously described (6). Mouse pancreases were digested in 2 ml Hanks Buffered Salt Solution (HBSS) containing collagenase P (1 mg/ml) and DNase I (0.15 mg/ml; both Roche Diagnostics, Burgess Hill, UK). Islets were hand-picked into RPMI 1640 media (containing 11 mol/L glucose, supplemented with 10% (v/v) heat-inactivated FBS; 100 U/ml penicillin and 100  $\mu$ g/ml streptomycin; all Sigma Aldrich, Poole, UK). Isolated islets were either picked into RPMI and immediately lysed for RNA extraction or transferred to RPMI and allowed to recover for 2 h, prior to *ex vivo* insulin secretion assay.

### **Insulin Secretion *ex vivo***

Islet insulin-secretion assays were conducted as previously described (6). Briefly, batches of ten size-matched islets were pre-incubated for 1 h at 37°C in HBSS containing 3 mM glucose, 10 mM HEPES (pH 7.4) and 0.2% BSA (w/v). For glucose-stimulated insulin secretion, islets were incubated for 1 h at 37°C in HBSS (10 mol/L HEPES (pH 7.4), 0.2% w/v BSA) supplemented with 3 mol/L or 17 mol/L glucose. After 1 h media was collected and insulin levels were determined using a specific ELISA (Merckodia, Uppsala, Sweden)

### **Immunofluorescence of Mouse Pancreatic Sections**

Islet immunostaining (27) for insulin and phospho-p38 was performed on pancreas sections that had been fixed in buffered paraformaldehyde (3.8%) and paraffin-embedded. Sections were incubated overnight at 4°C in guinea-pig anti-insulin antibody (1:100; Abcam, Cambridge, UK) and/or rabbit anti-phospho p38 (Thr<sup>180</sup>/Tyr<sup>182</sup>; Cell Signaling Technologies, MA, USA) antibody (1:1600) and detected with goat anti-guinea pig AlexaFluor<sup>®</sup> 647 (1:1000) and goat anti-rabbit AlexaFluor<sup>®</sup> 488 (1:1000) conjugated secondary antibody (Invitrogen, Waltham, MA, USA), respectively. DAPI (1:1000, Invitrogen, Waltham, MA, USA) was included in the final incubation step to stain cell nuclei. Sections were mounted in Vectashield hard-set mounting medium (Vector Laboratories, Peterborough, UK) under glass cover slips. Mouse pancreatic sections were analyzed using a Leica DM5000 Epi-Fluorescent microscope and Leica Application Suite software.

### **MIN6 Cell culture and treatment**

MIN6 beta-cells were cultured in DMEM media containing GlutaMAX, 25 mol/L glucose and Sodium pyruvate supplemented with 15% v/v foetal bovine serum, 1% v/v Penicillin/Streptomycin/Glutamine (all Life Technologies, Paisley, UK) and 5 µl β-mercaptoethanol. Cells were incubated for 48 h with recombinant eNAMPT (2 – 10 ng/ml; Adipogen, Seoul, South Korea) with or without eNAMPT-Ab (2.5 µg/ml). After 48 h treatments cells were analysed for changes in glucose-stimulated insulin secretion or NAD levels.

**ESM Table**

|               |                       |                         |
|---------------|-----------------------|-------------------------|
| <i>Tnfa</i>   | CGGAGTCCGGGCAGGT      | GCTGGGTAGAGAATGGATGAACA |
| <i>Il1b</i>   | GGGCTGCTTCCAAACCTTTG  | TGATACTGCCTGCCTGAAGCTC  |
| <i>Il6</i>    | GGTGACAACCACGGCCTTCCC | ACAGGTCTGGGCTGCTGGTC    |
| <i>Adgre1</i> | AGCACGTCCTATTICAACGGT | TCTGGAACACCACAAGAAAGTG  |
| <i>Ccl2</i>   | GGCTGGAGAGCTACAAGAGG  | GGTCAGCACAGACCTCTCTG    |
| <i>Itgam</i>  | TGGACGCTGATGGCAATACC  | GAGGCAAGGGACACACTGAC    |
| <i>Itgax</i>  | TGAGCTGTACCTGGATAGCCT | TGTGTCAGCTTCTCTGCATCC   |
| <i>Nampt</i>  | GCGAGCGAGCGGTGACT     | CTGCGAGCAAGGAGAAAAATG   |
| <i>Puma</i>   | TTCATGGGACTCCTCCCCTC  | GGTGTAGGCACCTAGTTGGG    |
| <i>Noxa</i>   | ACTGAACGGATGTTGCCTGT  | CCCGGGGAAAAGATCACAGT    |
| <i>Bad</i>    | CTTGAGGAAGTCCGATCCCG  | CATACTCTGGGCTGCTGGTC    |
| <i>Bax</i>    | GCTGGACACTGGACTTCCTC  | GAGGCCTTCCCAGCCAC       |
| <i>Chop</i>   | CCTAGCTTGGCTGACAGAGG  | GGGCACTGACCACTCTGTTT    |
| <i>Hmgb1</i>  | TTGCTTTGCCATTTTGGGT   | GGCATGTGGACAAAAGCTCTC   |
| <i>Srebf1</i> | GCAGACCCTGGTGAGTGG    | GTCGGTGGATGGGCAGTTT     |
| <i>Fasn</i>   | CACTGCATTGACGGCCGGGT  | GGACAAGCCCAGGCTGCGAG    |
| <i>Dgat2</i>  | TCTCAGCCCTCCAAGACATC  | GCCAGCCAGGTCAAGTAGAG    |
| <i>Pck1</i>   | TCCTGCAGAACACAAGGGC   | GGTCGCATGGCAAAGGG       |

**ESM Table 1.** List of qRT-PCR primer sequences used in this study

## ESM Figures and Legends

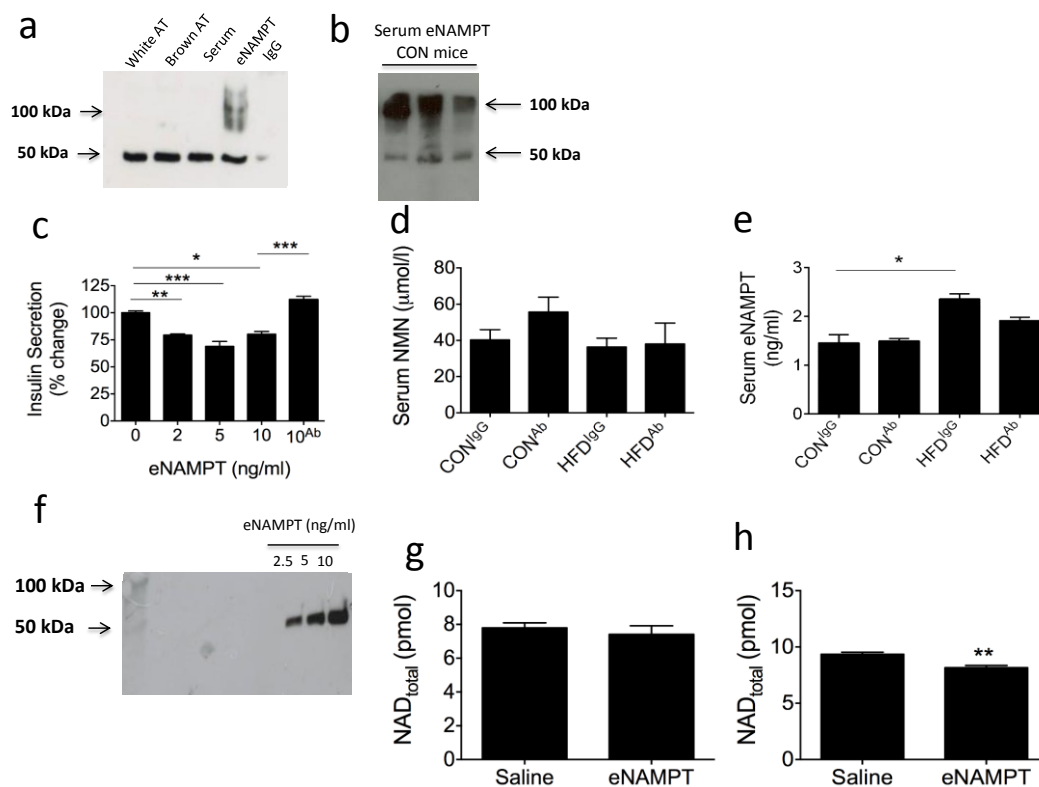

**ESM Fig. 1. Specificity of eNAMPT-Ab and recombinant eNAMPT protein.** (a) NAMPT/eNAMPT immunoprecipitation (with LSBio anti-NAMPT-Ab) and subsequent immunoblotting (with Bethyl Laboratories anti-NAMPT antibody); (b) serum eNAMPT monomer and dimer protein in CON fed mice, measured non-reducing SDS-PAGE and immunoblot (c) Glucose-stimulated insulin secretion from MIN6 cells following incubation with eNAMPT-monomer or co-incubated with eNAMPT-monomer and LSBio eNAMPT-Ab (48 h). Serum NMN (d) and total-eNAMPT (e) levels in 10 week-fed CON and HFD mice administered eNAMPT-Ab or control IgG. (f) Non-reducing SDS-PAGE gel and western blot of recombinant eNAMPT (Adipogen, Seoul, South Korea). NAD levels in (g) MIN6 cells following recombinant eNAMPT exposure (5 ng/ml; 48 h) and in (h) white AT following recombinant eNAMPT administration to mice (5 ng/ml/day; I.P. 14 days). Data are expressed as mean ± SEM. Statistically significant differences between groups are indicated by \*  $p < 0.05$ ; \*\*  $p < 0.01$ ; \*\*\*  $p < 0.001$ .

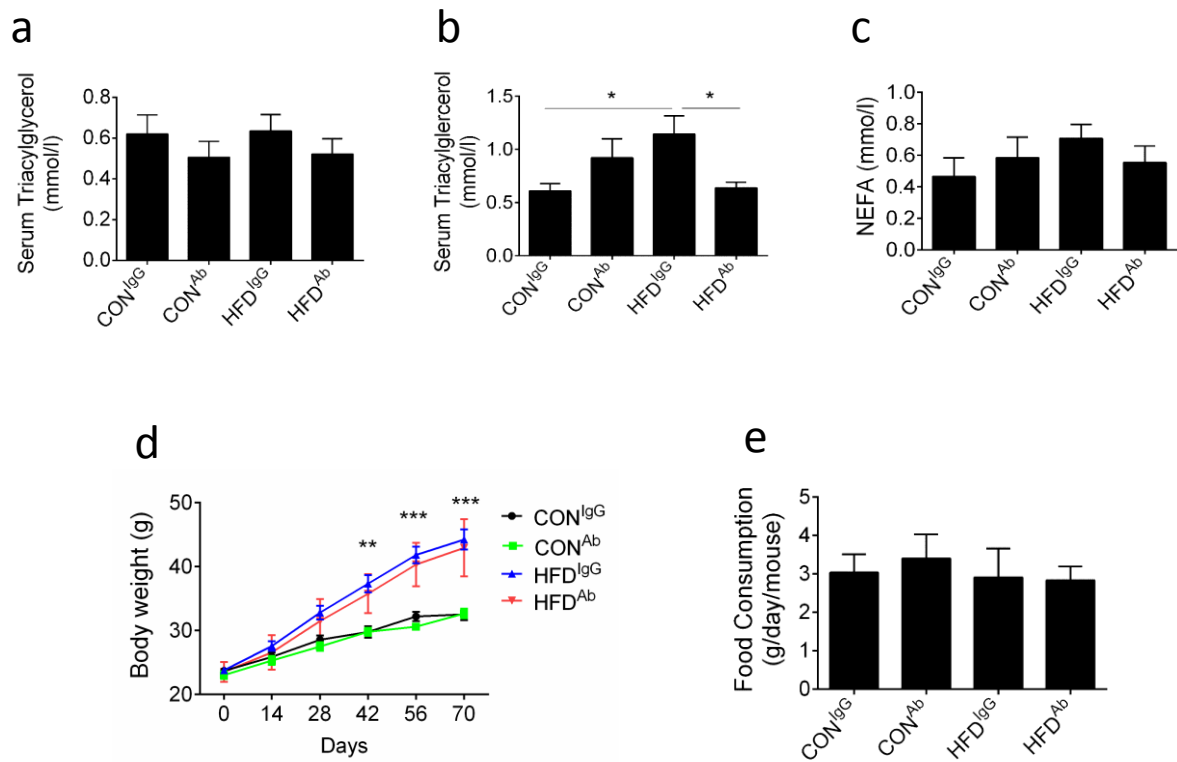

**ESM Fig. 2. Effects of eNAMPT-Ab on body weight and serum lipids.** CON and HFD mice (10 weeks) were administered eNAMPT-Ab or non-immune IgG; (a) Fasting serum triglyceride, (b) Fed serum triglyceride, (c) Fed serum NEFA levels, (d) Body weight, (e) Food intake post-antibody administration. Data are expressed as mean  $\pm$  SEM. Statistically significant differences between are indicated by \*\*  $p < 0.05$ ; \*\*  $p < 0.01$ ; \*\*\*  $p < 0.001$ ;

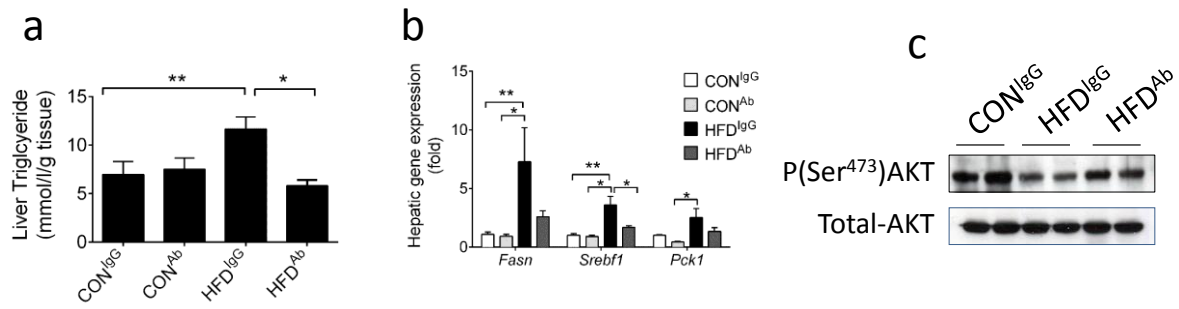

**ESM Fig. 3. Effects of eNAMPT-Ab on liver insulin sensitivity and lipid levels.** CON and HFD mice (10 weeks) were administered eNAMPT-Ab or non-immune IgG; (a) Liver triglycerides, (b) liver gluconeogenic and lipogenic gene expression, (c) liver phospho-AKT levels. Data are expressed as mean  $\pm$  SEM. Statistically significant differences between groups are indicated by \*  $p < 0.05$ , \*\*  $p < 0.01$ .

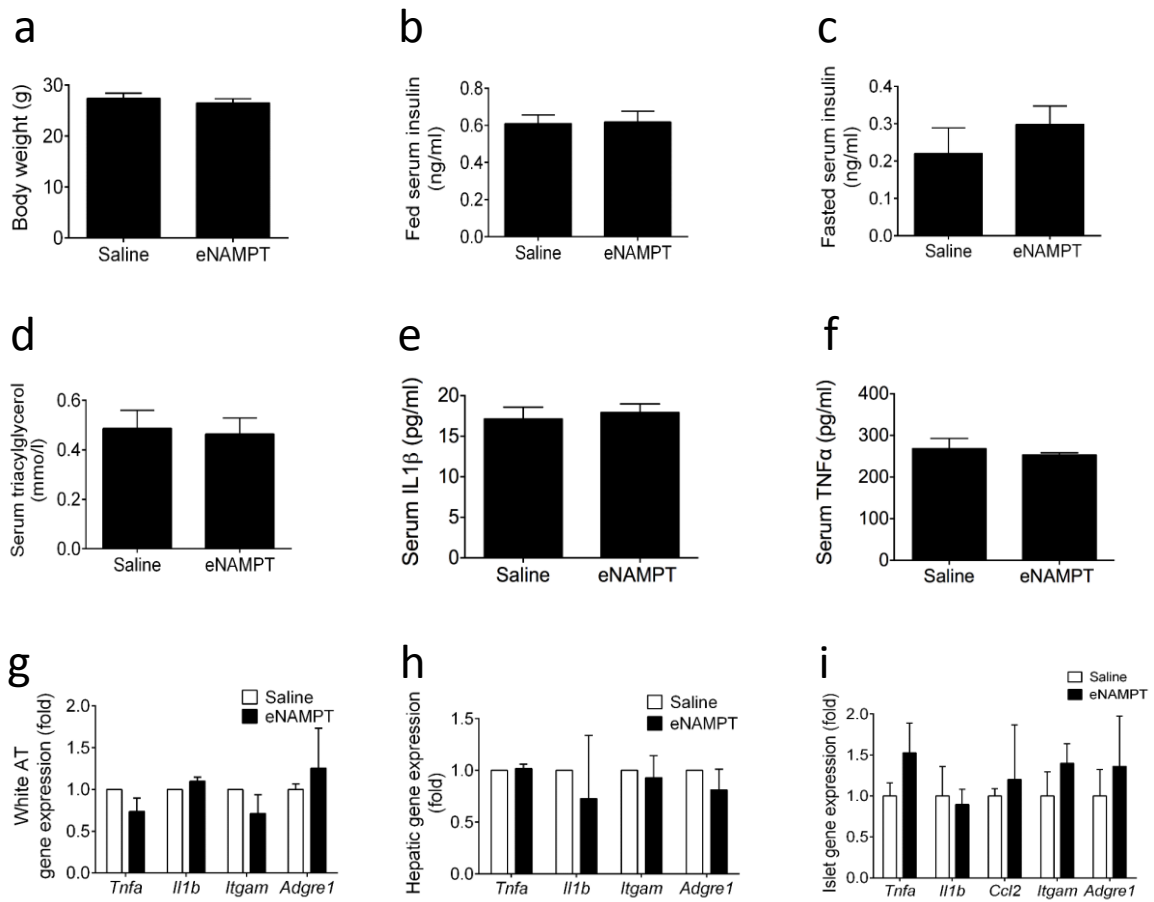

**ESM Fig. 4. Effects of 14-day eNAMPT administration in mice.** Mice were administered eNAMPT (5ng/ml) daily for 14 days; (a) body weight, (b) Fed serum insulin, (c) Fasting serum insulin (d) Serum Triglycerides, (e) Serum IL1 $\beta$ , (f) Serum TNF $\alpha$ . Pro-inflammatory gene expression in (g) WAT, (h) Liver, and (i) Islets. Data are expressed as mean  $\pm$  SEM.

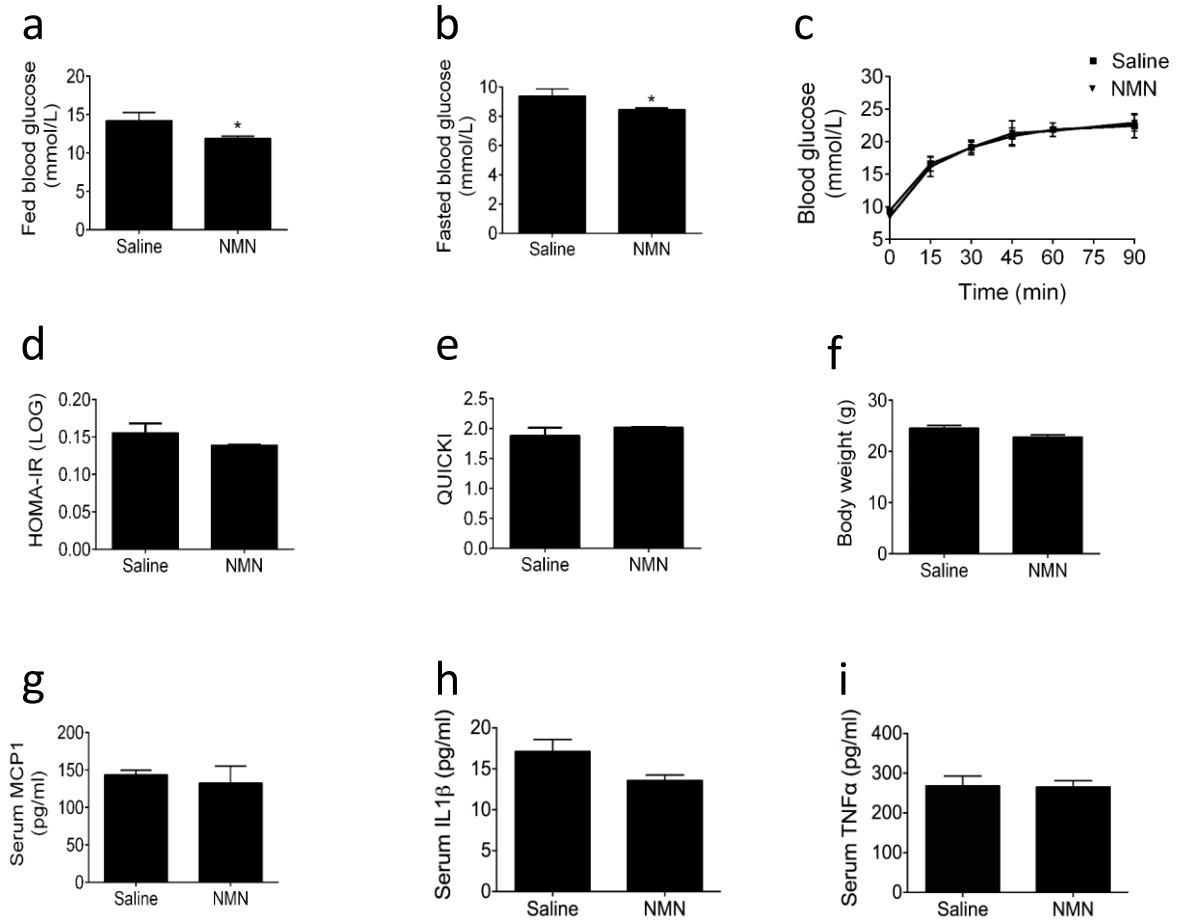

**ESM Fig. 5. Effects of 14-day NMN administration in mice.** Mice were administered NMN (500 mg/kg body weight) daily for 14 days; (a) Fed Blood Glucose, (b) Fasted blood glucose, (c) IPGTT; (d) HOMA-IR (LOG), (e) QUICKI; (f) Body weight. Serum levels of (g) MCP1, (h) IL1 $\beta$  and (i) TNF $\alpha$ . Data are expressed as mean  $\pm$  SEM. Statistically significant differences between groups are indicated by \*  $p < 0.05$ .
